# Supplementary material
Source: HighWire-hosted journal article supplement (https://bmjopen.bmj.com/content/8/11/e025533)
Supplement: inline-supplementary-material-1 [file inline-supplementary-material-1.pdf]

**Supplementary table 1. Individual list of cases with baseline putamen binding on the most affected side, and the pre-scan, post-scan and follow-up diagnoses.**

| Age | Putamen binding (%)* | Pre-scan diagnosis | Post-scan diagnosis | Follow-up diagnosis |
|-----|----------------------|--------------------|---------------------|---------------------|
| 52  | -93%                 | FUNCTIONAL         | NDG PD              | NDG PD              |
| 71  | -91%                 | NDG PD             | NDG PD              | NDG PD              |
| 69  | -90%                 | NDG PD             | NDG PD              | NDG PD              |
| 45  | -89%                 | NDG UNK            | NDG PD              | NDG PD              |
| 70  | -88%                 | NDG UNK            | NDG PD              | NDG PD              |
| 53  | -88%                 | NDG CBS            | NDG PD              | NDG PD              |
| 66  | -87%                 | NDG PD             | NDG PD              | NDG PD              |
| 54  | -87%                 | NDG PD             | NDG PD              | NDG PD              |
| 53  | -86%                 | NDG PD             | NDG PD              | NDG PD              |
| 63  | -85%                 | NDG PSP            | NDG PD              | NDG PD              |
| 74  | -85%                 | MRT                | NDG PD              | NDG PD              |
| 68  | -85%                 | NDG PD             | NDG PD              | NDG PD              |
| 49  | -85%                 | NDG PD             | NDG PD              | NDG PD              |
| 79  | -85%                 | RUBRAL TREMOR      | NDG PD              | RUBRAL TREMOR       |
| 51  | -84%                 | NDG UNK            | NDG PD              | NDG PD              |
| 64  | -84%                 | FUNCTIONAL         | NDG PSP             | NDG PSP             |
| 65  | -83%                 | NDG PD             | NDG PD              | NDG MSA             |
| 45  | -83%                 | NDG PD             | NDG PD              | NDG PD              |
| 69  | -82%                 | NDG PD             | NDG PD              | NDG MSA             |
| 68  | -80%                 | NDG PD             | NDG PD              | NDG PD              |
| 79  | -80%                 | NDG PD             | NDG PD              | NDG PD              |
| 44  | -79%                 | NDG PD             | NDG PD              | NDG PD              |
| 48  | -79%                 | NDG PD             | NDG PD              | NDG PD              |
| 50  | -79%                 | DRUG INDUCED       | NDG PD              | NDG PD              |
| 65  | -79%                 | VASCULAR           | NDG PD              | NDG PD              |
| 57  | -78%                 | MRT                | NDG PD              | NDG PD              |
| 30  | -78%                 | NDG PD             | NDG PD              | NDG PD              |
| 63  | -78%                 | DYSTONIA           | NDG PD              | NDG PD              |
| 59  | -76%                 | NDG UNK            | NDG PD              | NDG PD              |
| 62  | -76%                 | FUNCTIONAL         | NDG PD              | NDG PD              |
| 46  | -72%                 | NDG PD             | NDG PD              | NDG PD              |
| 58  | -72%                 | DYSTONIA           | NDG PD              | NDG PD              |
| 66  | -71%                 | NDG PD             | NDG PD              | NDG PD              |
| 72  | -71%                 | FUNCTIONAL         | NDG PD              | NDG PD              |
| 48  | -69%                 | NDG PD             | NDG PD              | NDG PD              |
| 67  | -69%                 | DYSTONIA           | NDG PD or MSA       | NDG MSA             |
| 46  | -62%                 | NDG PD             | NDG PD              | NDG PD              |
| 51  | -60%                 | NDG UNK            | NDG PD              | NDG PD              |
| 38  | -55%                 | DYSTONIA           | NDG PD              | NDG PD              |

|      |      |              |                    |                    |
|------|------|--------------|--------------------|--------------------|
| 70   | -54% | NDG UNK      | NDG PD             | NDG PD             |
| 68   | -39% | FUNCTIONAL   | FUNCTIONAL         | FUNCTIONAL         |
| 66   | -39% | DRUG INDUCED | DRUG INDUCED       | DRUG INDUCED       |
| 53   | -39% | MRT          | NDG PD             | NDG UNK            |
| 73** | -35% | NDG UNK      | NDG PD             | NDG PD             |
| 57   | -27% | NDG PD       | DYSTONIA           | DYSTONIA           |
| 61   | -25% | FUNCTIONAL   | FUNCTIONAL         | FUNCTIONAL         |
| 63   | -24% | DRUG INDUCED | DRUG INDUCED       | DRUG INDUCED       |
| 67   | -24% | DYSTONIA     | DYSTONIA           | DYSTONIA           |
| 57   | -23% | NDG PD       | ET                 | ET                 |
| 69   | -23% | ET           | ET                 | ET                 |
| 55   | -22% | ET           | ET                 | ET                 |
| 69   | -20% | DRUG INDUCED | DRUG INDUCED       | DRUG INDUCED       |
| 51   | -20% | NDG UNK      | OTHER              | FUNCTIONAL         |
| 61   | -20% | NDG PD       | NDG PD (SWEDD)     | NDG PD (SWEDD)     |
| 69   | -19% | DYSTONIA     | DYSTONIA           | DYSTONIA           |
| 47   | -19% | FUNCTIONAL   | FUNCTIONAL         | FUNCTIONAL         |
| 65** | -18% | NDG MSA      | NDG MSA            | NDG MSA            |
| 51   | -18% | NDG PD       | NDG PD (SWEDD)     | NDG PD (SWEDD)     |
| 71   | -16% | NDG PD       | ET                 | ET                 |
| 20   | -16% | NDG (UNK)    | UNK (NEUROGENETIC) | UNK (NEUROGENETIC) |
| 68   | -16% | DYSTONIA     | LOST TO FOLLOW-UP  | ET                 |
| 61   | -16% | NDG AD       | NDG AD             | NDG AD             |
| 68   | -13% | ET           | ET                 | ET                 |
| 63   | -11% | NDG PD       | ET                 | FUNCTIONAL         |
| 43   | -11% | NDG UNK      | MRT                | MRT                |
| 25   | -10% | DYSTONIA     | DYSTONIA           | DYSTONIA           |
| 69   | -8%  | NDG PD       | VASCULAR           | VASCULAR           |
| 72   | -6%  | DRUG INDUCED | DRUG INDUCED       | DRUG INDUCED       |
| 38   | -5%  | NDG PD       | FUNCTIONAL         | FUNCTIONAL         |
| 60   | -4%  | FUNCTIONAL   | FUNCTIONAL         | FUNCTIONAL         |
| 54   | -3%  | FUNCTIONAL   | FUNCTIONAL         | FUNCTIONAL         |
| 37   | -2%  | FUNCTIONAL   | FUNCTIONAL         | FUNCTIONAL         |
| 30   | -2%  | NDG PD       | FUNCTIONAL         | FUNCTIONAL         |
| 53   | 2%   | DYSTONIA     | DYSTONIA           | NDG PD             |
| 67   | 5%   | FUNCTIONAL   | FUNCTIONAL         | FUNCTIONAL         |
| 63   | 5%   | NDG PD       | FUNCTIONAL         | FUNCTIONAL         |
| 28   | 7%   | NDG PD       | UNKNOWN            | UNKNOWN            |
| 25   | 19%  | FUNCTIONAL   | FUNCTIONAL         | FUNCTIONAL         |
| 51   | 41%  | FUNCTIONAL   | FUNCTIONAL         | FUNCTIONAL         |
| 51   | 67%  | NDG PD       | DRUG INDUCED       | DRUG INDUCED       |
| 43   | 74%  | DYSTONIA     | FUNCTIONAL         | FUNCTIONAL         |

Green background denotes cases where clinical diagnosis was concordant with scan result.

Red background denotes cases where clinical diagnosis was discordant with scan result.

\* Putamen binding on the most affected side.

\*\* Visual assessment of scan demonstrated significant and asymmetrical reduction in posterior putamen binding compared to caudate binding

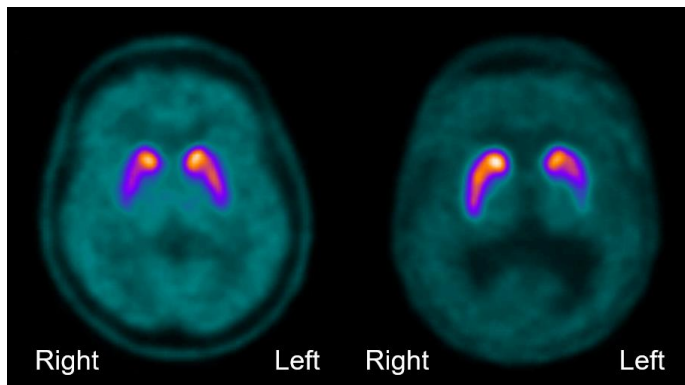

NDG = Neurodegenerative

PD = Parkinson's disease

MSA = multiple system atrophy

CBS = Corticobasal syndrome

AD = Alzheimer's disease

MRT = Monosymptomatic resting tremor

UNK = Unknown

ET = Essential tremor
